# Supplementary material for: Association of Metformin With Pregnancy Outcomes in Women With Polycystic Ovarian Syndrome Undergoing In Vitro Fertilization: A Systematic Review and Meta-analysis
Source: PubMed Central journal article supplement (PMC7399751; doi:10.1001/jamanetworkopen.2020.11995), 2020-08-03
Supplement: jamanetwopen-3-e2011995-s001.pdf [file jamanetwopen-3-e2011995-s001.pdf]

## Supplementary Online Content

Wu Y, Tu M, Huang Y, Liu Y, Zhang D. Association of metformin with pregnancy outcomes in women with polycystic ovarian syndrome undergoing in vitro fertilization: a systematic review and meta-analysis. *JAMA Netw Open*. 2020;3(8):e2011995.  
doi:10.1001/jamanetworkopen.2020.11995

**eAppendix.** Supplementary Methods

**eFigure 1.** Forest Plot of Comparison of Miscarriage Rate

**eFigure 2.** Funnel Graph of Comparison of the Outcomes of Clinical Pregnancy Rate

**eTable 1.** Baseline Characteristics of Included Studies

**eTable 2.** Specific Interventions of Included Studies

**eTable 3.** Excluded Studies

This supplementary material has been provided by the authors to give readers additional information about their work.

## eAppendix. Supplementary Methods

### 1. PubMed search:

(((((("Dimethylbiguanidine" OR "Dimethylguanylguanidine" OR "Glucophage" OR "Metformin Hydrochloride" OR "Hydrochloride, Metformin" OR "Metformin HCl" OR "HCl, Metformin")) OR "Metformin"[Mesh])) AND (((("Assisted Reproductive Technique" OR "Reproductive Technique, Assisted" OR "Technique, Assisted Reproductive" OR "Techniques, Assisted Reproductive" OR "Assisted Reproductive Technics" OR "Assisted Reproductive Technic" OR "Reproductive Technic, Assisted" OR "Reproductive Technics, Assisted" OR "Technic, Assisted Reproductive" OR "Technics, Assisted Reproductive" OR "Assisted Reproductive Techniques" OR "Reproductive Technology, Assisted" OR "Assisted Reproductive Technologies" OR "Assisted Reproductive Technology" OR "Reproductive Technologies, Assisted" OR "Technologies, Assisted Reproductive" OR "Technology, Assisted Reproductive")) OR "Reproductive Techniques, Assisted"[Mesh])) AND (((("Clinical Trials, Randomized" OR "Trials, Randomized Clinical" OR "Controlled Clinical Trials, Randomized")) OR "Randomized Controlled Trial" [Publication Type])) AND (((("Ovary Syndrome, Polycystic" OR "Syndrome, Polycystic Ovary" OR "Stein-Leventhal Syndrome" OR "Stein Leventhal Syndrome" OR "Syndrome, Stein-Leventhal" OR "Sclerocystic Ovarian Degeneration" OR "Ovarian Degeneration, Sclerocystic" OR "Sclerocystic Ovary Syndrome" OR "Polycystic Ovarian Syndrome" OR "Ovarian Syndrome, Polycystic" OR "Polycystic Ovary Syndrome 1" OR "Sclerocystic Ovaries" OR "Ovary, Sclerocystic" OR "Sclerocystic Ovary")) OR "Polycystic Ovary Syndrome"[Mesh]))

### 2. Embase search

'ovary polycystic disease'/exp AND 'metformin'/exp AND 'randomized controlled trial'/exp AND 'ovary hyperstimulation'/exp

### 3. Cochrane search

- #1 MeSH descriptor: [Polycystic Ovary Syndrome] explode all trees
- #2 ("polycystic ovary syndrome"):ti,ab,kw (Word variations have been searched)
- #3 MeSH descriptor: [Metformin] explode all trees
- #4 (metformin):ti,ab,kw (Word variations have been searched)
- #5 MeSH descriptor: [Randomized Controlled Trial] explode all trees
- #6 ("Randomized controlled trial"):ti,ab,kw (Word variations have been searched)

- #7 MeSH descriptor: [Reproductive Techniques, Assisted] explode all trees
- #8 ("Assisted Reproductive Techniques"):ti,ab,kw (Word variations have been searched)
- #9 (#1 OR #2) AND (#3 OR #4) AND (#5 OR #6) AND (#7 OR #8)

**eFigure1. Forest Plot of Comparison of Miscarriage Rate**

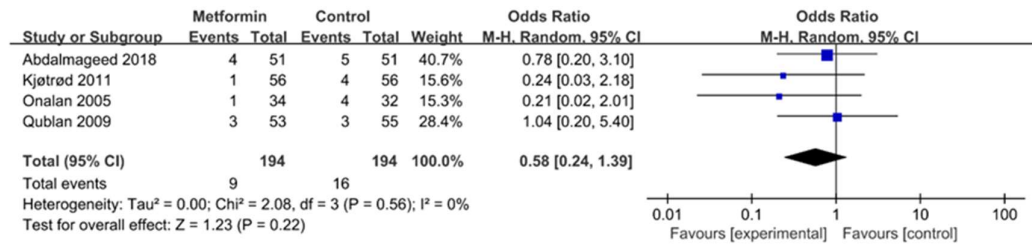

**eFigure2. Funnel Graph of Comparison of the Outcomes of Clinical Pregnancy Rate**

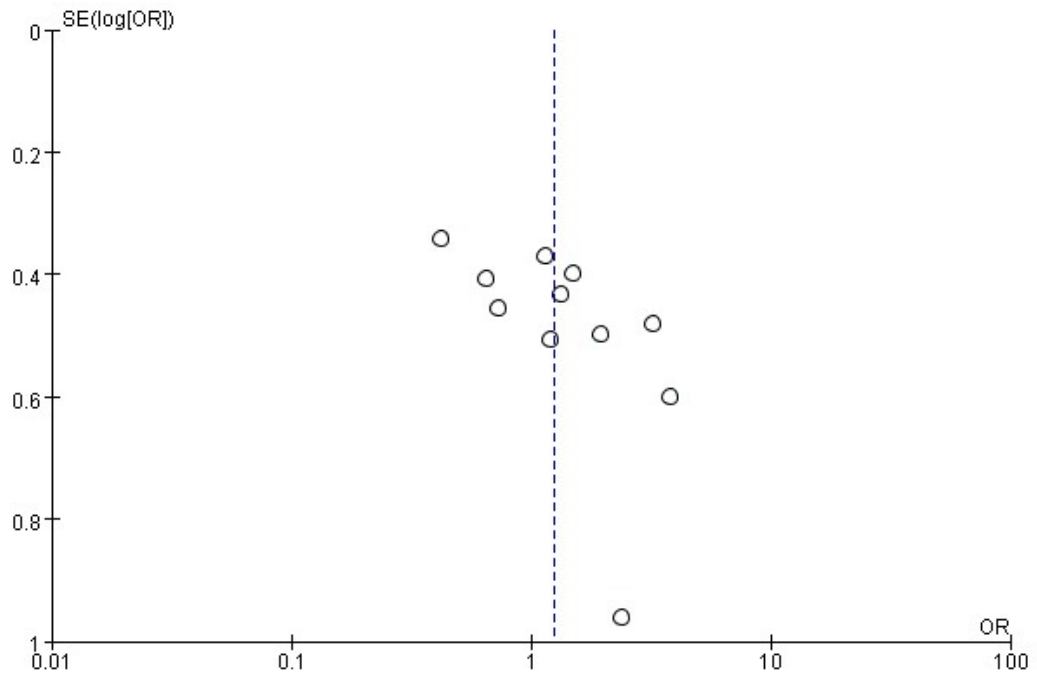

**eTable 1. Baseline Characteristics of Included Studies**

| Author      | Year | Site   | PCOS<br>Diagnosis     | COS<br>Protocol    | Number<br>Metformin | Number<br>Control | Age(year)<br>Metformin | Age(year)<br>control | BMI(kg/m <sup>2</sup> )<br>Metformin | BMI(kg/m <sup>2</sup> )<br>Control |
|-------------|------|--------|-----------------------|--------------------|---------------------|-------------------|------------------------|----------------------|--------------------------------------|------------------------------------|
| Abdalmageed | 2018 | Egypt  | Rotterdam<br>criteria | GnRH<br>agonist    | 51                  | 51                | 31.1(3.7)              | 31.9(3.6)            | 33.8(4.4)                            | 32.9(6.7)                          |
| Jacob       | 2016 | UK     | Rotterdam<br>criteria | GnRH<br>antagonist | 77                  | 76                | 29.9(4.4)              | 29.6(3.9)            | 25.3(3.4)                            | 25(3.3)                            |
| Cheraghi    | 2014 | Iran   | Rotterdam<br>criteria | GnRH<br>agonist    | 15                  | 15                | 28.1(3.4)              | 27.9(2.8)            | 27.9(3.1)                            | 26.9(2.3)                          |
| An          | 2013 | China  | Rotterdam<br>criteria | GnRH<br>agonist    | 41                  | 43                | 28.7(4.2)              | 28.4(4)              | 24(3)                                | 24.2(3.2)                          |
| Kjøtrød     | 2011 | Nordic | Rotterdam<br>criteria | GnRH<br>agonist    | 74                  | 75                | 29.6(3.4)              | 29.5(3.8)            | 24(2.7)                              | 23.6(2.8)                          |
| Palomba     | 2011 | Italy  | Rotterdam<br>criteria | GnRH<br>agonist    | 60                  | 60                | 28.5(3)                | 29(3)                | 26.5(2.8)                            | 27(2.7)                            |
| Palomba2    | 2011 | Italy  | Rotterdam<br>criteria | GnRH<br>agonist    | 44                  | 44                | 40(2.8)                | 39(3.3)              | 25.4(2.8)                            | 26(2.9)                            |
| Qublan      | 2009 | Jordan | Rotterdam<br>criteria | GnRH<br>agonist    | 34                  | 32                | 34.6(4.3)              | 33.8(3.9)            | 32.2(3)                              | 31.9(3)                            |
| Tang        | 2006 | UK     | Rotterdam<br>criteria | GnRH<br>agonist    | 52                  | 49                | 31.1(4)                | 31.1(4)              | 27.9(5.6)                            | 26.9(4.8)                          |
| Doldi       | 2006 | Italy  | Rotterdam<br>criteria | GnRH<br>antagonist | 20                  | 20                | /                      | /                    | /                                    | /                                  |
| Onalan      | 2005 | Turkey | NIH<br>consensus      | GnRH<br>agonist    | 53                  | 55                | 29.3(3.9)              | 29.8(5.3)            | 25(5.5)                              | 23.5(3.8)                          |

|         |      |        |                  |                 |    |    |           |           |           |           |
|---------|------|--------|------------------|-----------------|----|----|-----------|-----------|-----------|-----------|
| Kjøtrød | 2004 | Norway | NIH<br>consensus | GnRH<br>agonist | 31 | 32 | 30.2(3.7) | 28.9(3.6) | 28.6(5.0) | 29.9(5.8) |
|---------|------|--------|------------------|-----------------|----|----|-----------|-----------|-----------|-----------|

PCOS: Polycystic ovary syndrome, GnRH: gonadotropin-releasing hormone. Rotterdam criteria referred the diagnosis of PCOS was following the Rotterdam Consensus. Intervention duration means the duration of metformin or placebo treatment. Baseline characteristics were calculated and represented in: number, mean (SD).

**eTable 2. Specific Interventions of Included Studies**

| Author      | Year | Dose of Intervention                                             | Duration of intervention                                                                                                                                                                                                                             |
|-------------|------|------------------------------------------------------------------|------------------------------------------------------------------------------------------------------------------------------------------------------------------------------------------------------------------------------------------------------|
| Abdalmageed | 2018 | Metformin 500 mg once daily                                      | Start from the date of controlled ovarian stimulation (COS), and until the day of pregnancy check. If pregnancy test was positive, the patient was instructed to continue metformin treatment during the first 12 weeks of gestation in both groups. |
| Jacob       | 2016 | Metformin 850 mg twice daily                                     | Start from mid luteal stage or Day 1 of the period, and until the day before egg collection.                                                                                                                                                         |
| Cheraghi    | 2014 | Metformin 500 mg three times daily                               | Start from the third day of their last menstrual period in the previous cycle, and until the day of oocyte aspiration.                                                                                                                               |
| An          | 2013 | Metformin 500 mg three times daily                               | Start from $\geq 12$ weeks prior to COS                                                                                                                                                                                                              |
| Kjøtrød     | 2011 | Metformin was gradually increased from 500 to 2000 mg once daily | Start from $\geq 12$ weeks prior to COS, and until the day of pregnancy testing.                                                                                                                                                                     |
| Palomba     | 2011 | Metformin 500 mg three times daily                               | Start from the day of GnRH-a administration, and until the day of a positive pregnancy test or menstrual bleeding appeared.                                                                                                                          |
| Palomba2    | 2011 | Metformin 500 mg three times daily                               | Start from 1 month before COS until a positive pregnancy test or menstrual bleeding occurred                                                                                                                                                         |
| Qublan      | 2009 | Metformin 850 mg twice daily                                     | Start from 1 month before the IVF treatment, and until the day of pregnancy test. If the test was positive, metformin was continued for first 12 weeks of gestation in the metformin-treated group.                                                  |
| Tang        | 2006 | metformin 850 mg twice daily                                     | Start from the first day of down-regulation, and until the day of egg retrieval                                                                                                                                                                      |
| Doldi       | 2006 | Metformin 1500 mg daily                                          | Start from two months before the IVF treatment, and until the day of embryo transfer                                                                                                                                                                 |



|          |      |                                                                                                                                         |                                                                                            |
|----------|------|-----------------------------------------------------------------------------------------------------------------------------------------|--------------------------------------------------------------------------------------------|
| Onalan   | 2005 | Metformin 850 mg twice or three times daily according to body mass index (BMI) $<28\text{kg/m}^2$ or $\text{BMI} \geq 28\text{ kg/m}^2$ | Start form 8 weeks before their first ICSI cycles, and until a positive pregnancy test     |
| Kjørtrød | 2004 | Metformin 500 mg twice daily                                                                                                            | Start form at least 16 weeks, and until the day of ovulation induction with HCG injection. |

**eTable 3. Excluded Studies**

| Author      | Year | Rational                                                                                                           |
|-------------|------|--------------------------------------------------------------------------------------------------------------------|
| Fedorcsák P | 2003 | This study is a two-phase cross-over study, which doesn't meet our inclusion criteria.                             |
| Visnová H   | 2003 | It is an article in Czech and doesn't meet our inclusion criteria.                                                 |
| Swanton A   | 2011 | Participates didn't meet the inclusion criteria. In this article, participates were confirmed to PCO but not PCOS. |
